# Supplementary material for: Length of hospital stay and associated factors among heart failure patients admitted to the University Hospital in Northwest Ethiopia
Source: PubMed Central journal article supplement (PMC9307162; doi:10.1371/journal.pone.0270809), 2022-07-22
Supplement: pone.0270809.s001.pdf [file pone.0270809.s001.pdf]

1 **S1 Table. Correlations between patient characteristics and LOS among AHF patients.**

| Variable                                    | Pearson rho | Spearman's rho | P-value   |
|---------------------------------------------|-------------|----------------|-----------|
| Gender                                      |             | -0.085         | 0.171     |
| Age                                         | -0.130      |                | 0.036*    |
| Types of HF                                 |             | -0.060         | 0.330     |
| Causes of HF                                |             | 0.151          | 0.014*    |
| Precipitating factors of HF                 |             | 0.181          | 0.003*    |
| Asthma                                      |             | 0.065          | 0.296     |
| Sepsis                                      |             | -0.029         | 0.641     |
| Cardiogenic shock                           |             | 0.030          | 0.625     |
| Diabetes mellitus                           |             | 0.082          | 0.182     |
| Anemia                                      |             | -0.116         | 0.60      |
| Dyslipidemia                                |             | 0.109          | 0.078     |
| Hypertension                                |             | -0.047         | 0.446     |
| Atrial fibrillation                         |             | 0.011          | 0.857     |
| Renal disease                               |             | -0.040         | 0.523     |
| Stroke                                      |             | -0.052         | 0.405     |
| Thyroid disease                             |             | 0.077          | 0.213     |
| Degenerative valvular heart disease         |             | -0.092         | 0.136     |
| Cancer comorbidity                          |             | -0.056         | 0.364     |
| HIV comorbidity                             |             | -0.145         | 0.019*    |
| Tuberculosis                                |             | -0.088         | 0.155     |
| Cor pulmonale                               |             | -0.048         | 0.436     |
| Ischemic heart disease                      |             | 0.070          | 0.256     |
| Rheumatic heart disease                     |             | -0.129         | 0.037*    |
| Chronic obstructive pulmonary disease       |             | -0.078         | 0.206     |
| community acquired pneumonia                |             | 0.180          | 0.003*    |
| Dilated cardiomyopathy                      |             | 0.131          | 0.034*    |
| Number of comorbidities                     | 0.286       |                | < 0.001** |
| New York Heart Association functional class |             | 0.138          | 0.026*    |

|                                           |       |        |           |
|-------------------------------------------|-------|--------|-----------|
| Systolic blood pressure                   |       | -0.114 | 0.064     |
| Diastolic blood pressure                  |       | -0.118 | 0.055     |
| Respiratory rate                          |       | -0.198 | 0.001*    |
| Heart rate                                |       | 0.028  | 0.656     |
| Temperature                               | 0.073 |        | 0.238     |
| Left ventricular ejection fraction        |       | -0.036 | 0.556     |
| Respiratory rate                          |       | 0.198  | 0.001*    |
| Serum creatine                            |       | -0.080 | 0.198     |
| Hemoglobin                                |       | -0.011 | 0.860     |
| Serum sodium                              | 0.032 |        | 0.602     |
| Serum potassium                           |       | 0.238  | < 0.001** |
| Dyspnea at rest                           |       | 0.053  | 0.393     |
| Dyspnea on exertion                       |       | 0.006  | 0.925     |
| Easy fatiguability                        |       | 0.004  | 0.947     |
| Atrial fibrillation                       |       | -0.006 | 0.918     |
| Peripheral edema                          |       | 0.067  | 0.282     |
| Elevate jugular venous pressure           |       | 0.143  | 0.020*    |
| Cardiomegaly                              |       | 0.001  | 0.989     |
| Third heart sound (S <sub>3</sub> gallop) |       | 0.168  | 0.006*    |
| Orthopnea                                 |       | 0.055  | 0.371     |
| Paroxysmal nocturnal dyspnea              |       | 0.145  | 0.019*    |
| Neck vein distension                      |       | 0.053  | 0.391     |
| Murmur                                    |       | 0.131  | 0.034*    |
| Furosemide                                |       | -0.003 | 0.960     |
| Spiroinolactone                           |       | 0.080  | 0.195     |
| Digoxin                                   |       | 0.40   | 0.520     |
| Enalapril                                 |       | 0.106  | 0.087     |
| Metoprolol                                |       | -0.036 | 0.557     |
| Atenolol                                  |       | -0.124 | 0.045*    |
| Aspirin                                   |       | 0.094  | 0.128     |
| Warfarin                                  |       | -0.055 | 0.376     |

|                        |  |        |        |
|------------------------|--|--------|--------|
| Atorvastatin           |  | 0.153  | 0.013* |
| Unfractionated heparin |  | -0.079 | 0.201  |
| Amlodipine             |  | -0.076 | 0.222  |
| Dopamine               |  | -0.115 | 0.063  |
| Clopidogrel            |  | 0.095  | 0.125  |
| Number of medications  |  | -0.175 | 0.004* |

2 HF, heart failure; HIV, Human Immunodeficiency Virus

3 \*Correlation is significant at  $p \leq 0.05$  (2-tailed).

4 \*\*Correlation is significant at  $p < 0.001$  (2-tailed).

5

6

7

8

9

10

11

12

13

14

15

16

17
