# Supplementary material for: Length of hospital stay and associated factors among heart failure patients admitted to the University Hospital in Northwest Ethiopia
Source: PubMed Central journal article supplement (PMC9307162; doi:10.1371/journal.pone.0270809), 2022-07-22
Supplement: pone.0270809.s002.pdf [file pone.0270809.s002.pdf]

1 **S1 Annex. Data abstraction format of AHF patients.**

2 **Code:** \_\_\_\_\_

3 **Section I: Socio-demographic Characteristics**

4 **Gender**      Male                  Female      **Age:** \_\_\_\_\_

5 **Section II: Clinical Characteristics at Admission**

6 **Types of HF**                  New onset                  ADCHF

7 **NYHA functional Class**      I      II      III      IV

8 **Vital signs at admission**

9 Systolic blood pressure \_\_\_\_\_ (mmHg)      Diastolic blood pressure \_\_\_\_ (mmHg)

10 Pulse rate \_\_\_\_\_ (bpm)      Respiratory rate \_\_\_\_\_ (bpm)

11 Body temperature \_\_\_\_\_ (°C)

12 **Sign and symptoms at admission**

13 Cardiomegaly                  Neck vein distension                  Orthopnea

14 S3 gallop (third heart sound)                  PND

15 Easy fatiguability                  Peripheral edema                  Dyspnea at rest

16 Dyspnea on exertion                  Murmur                  Elevated JVP

17 **Electrocardiogram finding**

18 AF

19 **Echocardiogram finding**

20 LVEF: \_\_\_\_\_ (%)

21 **Laboratory values**

22 Serum Na+ \_\_\_\_\_ (mEq/L)                  Serum K+ \_\_\_\_\_ (mEq/L)

23 Hemoglobin \_\_\_\_\_(g/dL)                  Serum creatinine \_\_\_\_\_(mg/dL)

24 **Precipitating factors of AHF at Admission**

25 IHD Anemia AF

26 CAP HTN DCMP

27 TB Thyroid disorder Renal disease

28 Non adherence to medical regimen Undefined

29 Other: \_\_\_\_\_

30 **Underlying causes of AHF at Admission**

31 CRHD Cor pulmonale DVHD DCMP

32 HTN IHD Stroke Anemia

33 AF COPD Other: \_\_\_\_\_

34 **Co-morbidity**

35 IHD AF Asthma DCMP

36 Cancer Renal disease COPD Diabetes mellitus

37 Dyslipidemia HIV/AIDS Thyroid disorder

38 HTN TB CRHD Stroke

39 DVHD CAP Dyslipidemia Sepsis

40 Cardiogenic shock Cor pulmonale Other: \_\_\_\_\_

41 Number of comorbidities

42 **Section III: Medication Assessment**

43 **Medications given for the management of A H F during the hospital course**

44 Furosemide Spironolactone Digoxin Metoprolol

45 Atenolol Enalapril Aspirin Warfarin

46 Atorvastatin Unfractionated Heparin Amlodipine Propranolol

47 Dopamine Clopidogrel Other: \_\_\_\_\_

48 Number of medications: \_\_\_\_\_

49 **Use of Mechanical ventilation (Intranasal oxygen therapy)**      Yes                  No

50 **Medications given during discharge**

51 Furosemide                  Spironolactone                  Digoxin                  Metoprolol

52 Atenolol                  Enalapril                  Aspirin                  Warfarin

53 Atorvastatin                  Amlodipine      Propranolol      Clopidogrel

54 **Section IV: Outcome**

55 Date of admission: \_\_\_\_\_ Date of Discharge: \_\_\_\_\_

56 Length of hospital stay: \_\_\_\_\_

57

58
